# Supplementary material
Source: HighWire-hosted journal article supplement (https://www.cmajopen.ca/highwire/filestream/81300/field_highwire_adjunct_files/0/2019-0149-1-at.pdf)
Supplement: 2019-0149-1-at.pdf [file 2019-0149-1-at.pdf]

**Appendix 1 (as supplied by the authors):** Questions about adverse childhood experiences

The following questions are about events that happened during YOUR childhood; that is, before 18 years of age.

- |                                                                                                                                                          |                             |
|----------------------------------------------------------------------------------------------------------------------------------------------------------|-----------------------------|
| 1. Did you live with anyone who was depressed, mentally ill, or suicidal?                                                                                | Yes/no                      |
| 2. Did you live with anyone who was a problem drinker or alcoholic?                                                                                      | Yes/no                      |
| 3. Did you live with anyone who used illegal street drugs or who abused prescription medications?                                                        | Yes/no                      |
| 4. Did you live with anyone who served time or was sentenced to serve time in prison, jail or other correctional facility?                               | Yes/no                      |
| 5. Were your parents separated or divorced?                                                                                                              | Yes/no                      |
| 6. How often did your parents or adults in your household ever slap, hit, kick, punch or beat each other up?                                             | Yes/no                      |
| 7. Before age 18, how often did a parent or adult in your home ever hit, beat, kick, or physically hurt you in any way? (Please do not include spanking) | (never/once/more than once) |
| 8. How often did a parent or adult in your home ever swear at you, insult you, or put you down?                                                          | (never/once/more than once) |
| 9. How often did anyone at least 5 years older than you or an adult ever touch you sexually?                                                             | (never/once/more than once) |
| 10. How often did anyone at least 5 years older than you or an adult try to make you touch them sexually?                                                | (never/once/more than once) |
| 11. How often did anyone at least 5 years older than you or an adult force you to have sex?                                                              | (never/once/more than once) |
